# Supplementary material for: Characterization of Oregano Essential Oil (Origanum vulgare L. subsp. hirtum) Particles Produced by the Novel Nano Spray Drying Technique
Source: MDPI journal article supplement (doi:10.3390/foods10122923), 2021-11-25
Supplement: s1 [file s1]

# Characterization of Oregano Essential Oil (*Origanum vulgare* L. subsp. *hirtum*) Particles Produced by the Novel Nano Spray Drying Technique

Fotini Plati <sup>1</sup>, Rigini Papi <sup>2</sup> and Adamantini Paraskevopoulou <sup>1,\*</sup>

<sup>1</sup> Laboratory of Food Chemistry and Technology, School of Chemistry, Aristotle University of Thessaloniki,  
54 124 Thessaloniki, Greece

<sup>2</sup> Laboratory of Biochemistry, School of Chemistry, Aristotle University of Thessaloniki, 54 124 Thessaloniki, Greece

\* Correspondence: adparask@chem.auth.gr

## Supplementary Material

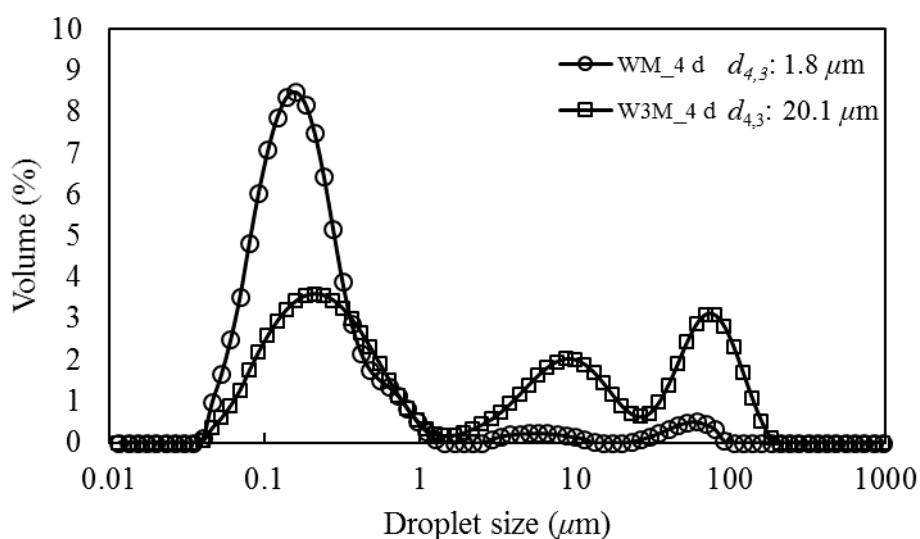

Figure S1. Droplet size distribution of OEO emulsions after four days storage.
